# Supplementary material
Source: ML conference proceedings conference paper supplement (https://proceedings.neurips.cc/paper_files/paper/2023/hash/4e8f257e054abd24c550d55e57cec274-Abstract.html)
Supplement: Supplementary file 1 [file 4e8f257e054abd24c550d55e57cec274-Supplemental-Conference.pdf]

## 434 A Multiple min $s$ - $t$ cuts

435 Let  $G$  and  $G'$  be two neighboring graphs, and let  $\tilde{G}$  and  $\tilde{G}'$ , respectively, be their modified versions  
 436 constructed by [Algorithm 1](#). [Algorithm 1](#) outputs a min  $s$ - $t$  cut in  $G$ . However, what happens if there  
 437 are multiple min  $s$ - $t$  cuts in  $G$  and the algorithm invoked on [Line 4](#) breaks ties in a way that depends  
 438 on whether a specific edge  $e$  appears in  $G$  or not? If it happens that  $e$  is the edge difference between  
 439  $G$  and  $G'$ , then such a tie-breaking rule might reveal additional information about  $G$  and  $G'$ . We now  
 440 outline how this can be bypassed.

441 Observe that if the random variables  $X_{s,u}$  and  $X_{t,u}$  were sampled by using infinite bit precision,  
 442 then with probability 1 no two cuts would have the same value. So, consider a more realistic  
 443 situation where edge-weights are represented by  $O(\log n)$  bits, and assume that the least significant  
 444 bit corresponds to the value  $2^{-t}$ , for an integer  $t \geq 0$ . We show how to modify edge-weights by  
 445 additional  $O(\log n)$  bits that have extremely small values but will help obtain a unique min  $s$ - $t$  cut.  
 446 Our modification consists of two steps.

447 **First step.** All the bits corresponding to values from  $2^{-t-1}$  to  $2^{-t-2\log n}$  remain 0, while those  
 448 corresponding to larger values remain unchanged. This is done so that even summing across all – but  
 449 at most  $\binom{n}{2}$  – edges it holds that no matter what the bits corresponding to values  $2^{-t-2\log n-1}$  and  
 450 less are, their total value is less than  $2^{-t}$ . Hence, if the weight of cut  $C_1$  is smaller than the weight  
 451 of cut  $C_2$  before the modifications we undertake, then  $C_1$  has a smaller weight than  $C_2$  after the  
 452 modifications as well.

453 **Second step.** We first recall the celebrated Isolation lemma.

454 **Lemma A.1** (Isolation lemma, [\[25\]](#)). *Let  $T$  and  $N$  be positive integers, and let  $\mathcal{F}$  be an arbitrary*  
 455 *nonempty family of subsets of the universe  $\{1, \dots, T\}$ . Suppose each element  $x \in \{1, \dots, T\}$  in the*  
 456 *universe receives an integer weight  $g(x)$ , each of which is chosen independently and uniformly at*  
 457 *random from  $\{1, \dots, N\}$ . The weight of a set  $S \in \mathcal{F}$  is defined as  $g(S) = \sum_{x \in S} g(x)$ .*

458 *Then, with probability at least  $1 - T/N$  there is a unique set in  $\mathcal{F}$  that has the minimum weight*  
 459 *among all sets of  $\mathcal{F}$ .*

460 We now apply [Lemma A.1](#) to conclude our modification of the edge weights in  $\tilde{G}$ . We let the  
 461 universe  $\{1, \dots, T\}$  from that lemma be the following  $2(n-2)$  elements  $\mathcal{U} = \{(s, v) \mid v \in$   
 462  $V(G) \setminus \{s, t\}\} \cup \{(t, v) \mid v \in V(G) \setminus \{s, t\}\}$ . Then, we let  $\mathcal{F}$  represent all min  $s$ - $t$  cuts in  $\tilde{G}$ ,  
 463 i.e.,  $S \subseteq \mathcal{U}$  belongs to  $\mathcal{F}$  iff there is a min  $s$ - $t$  cut  $C$  in  $\tilde{G}$  such that for each  $(a, b) \in S$  the cut  $C$   
 464 contains  $X_{a,b}$ . So, by letting  $N = 2n^2$ , we derive that with probability  $1 - 1/n$  it holds that no two  
 465 cuts represented by  $\mathcal{F}$  have the same minimum value **with respect to  $g$**  defined in [Lemma A.1](#). To  
 466 implement  $g$  in our modification of weights, we modify the bits of each  $X_{s,v}$  and  $X_{t,v}$  corresponding  
 467 to values from  $2^{-t-2\log n-1}$  to  $2^{-t-2\log n-\log N}$  to be an integer between 1 and  $N$  chosen uniformly  
 468 at random.

469 Only after these modifications, we invoke [Line 4](#) of [Algorithm 1](#). Note that the family of cuts  $\mathcal{F}$  is  
 470 defined only for the sake of analysis. It is not needed to know it algorithmically.

## 471 B Lower Bound for min $s$ - $t$ cut error

472 In this section, we prove our lower bound. Our high-level idea is similar to that of [\[8\]](#) for proving a  
 473 lower bound for private algorithms for correlation clustering.

474 **Theorem 1.2.** *Any  $(\epsilon, \delta)$ -differential private algorithm for min  $s$ - $t$  cut on  $n$ -node graphs requires*  
 475 *expected additive error of at least  $n/20$  for any  $\epsilon \leq 1$  and  $\delta \leq 0.1$ .*

476 *Proof.* For the sake of contradiction, let  $\mathcal{A}$  be a  $(\epsilon, \delta)$ -differential private algorithm for min  $s$ - $t$  cut  
 477 that on any input  $n$ -node graph outputs an  $s$ - $t$  cut that has expected additive error of less than  $n/20$ .  
 478 We construct a set of  $2^n$  graphs  $S$  and show that  $\mathcal{A}$  cannot have low expected cost on all of the graphs  
 479 on this set while preserving privacy.

480 The node set of all the graphs in  $S$  are the same and consist of  $V = \{s, t, v_1, \dots, v_n\}$  where  $s$  and  $t$   
 481 are the terminals of the graph and  $n > 30$ . For any  $\tau \in \{0, 1\}^n$ , let  $G_\tau$  be the graph on node set  $V$

with the following edges: For any  $1 \leq i \leq n$ , if  $\tau_i = 1$ , then there is an edge between  $s$  and  $v_i$ . If  $\tau = 0$ , then there is an edge between  $t$  and  $v_i$ . Note that  $v_i$  is attached to exactly one of the terminals  $s$  and  $t$ . Moreover, the min  $s$ - $t$  cut of each graph  $G_\tau$  is zero.

Algorithm  $\mathcal{A}$  determines for each  $i$  if  $v_i$  is on the  $s$ -side of the output cut or the  $t$ -side. The contribution of each node  $v_i$  to the total error is the number of edges attached to  $v_i$  that are in the cut. We denote this random variable in graph  $G_\tau$  by  $e_\tau(v_i)$ . Since there are no edges between any two non-terminal nodes in any of the graphs  $G_\tau$ , the total error of the output is the sum of these individual errors, i.e.,  $\sum_{i=0}^n e_\tau(v_i)$ . Let  $\bar{e}_\tau(v_i)$  be the expected value of  $e_\tau(v_i)$  over the outputs of  $\mathcal{A}$  given  $G_\tau$ .

Let  $p_\tau^{(i)}$  be the marginal probability that  $v_i$  is on the  $s$ -side of the output  $s$ - $t$  cut in  $G_\tau$ . If  $\tau_i = 0$ , then  $v_i$  is connected to  $t$  and so  $\bar{e}_\tau(v_i) = p_\tau^{(i)}$ . If  $\tau_i = 1$ , then  $v_i$  is connected to  $s$  and so  $\bar{e}_\tau(v_i) = 1 - p_\tau^{(i)}$ . By the assumption that  $\mathcal{A}$  has a low expected error on every input, we have that for any  $\tau \in \{0, 1\}^n$ ,

$$(n+2)/20 > \sum_{i, \tau_i=0} p_\tau^{(i)} + \sum_{i, \tau_i=1} (1 - p_\tau^{(i)}) \quad (3)$$

Let  $S_i$  be the set of  $\tau \in \{0, 1\}^n$  such that  $\tau_i = 0$ , and  $\bar{S}_i$  be the complement of  $S_i$ , so that  $\tau \in \bar{S}_i$  if  $\tau_i = 1$ . Note that  $|S_i| = |\bar{S}_i| = 2^{n-1}$ . Fix some  $i$ , and for any  $\tau \in \{0, 1\}^n$ , let  $\tau'$  be the same as  $\tau$  except for the  $i$ -th entry being different, i.e., for all  $j \neq i$ ,  $\tau_j = \tau'_j$ , and  $\tau_i \neq \tau'_i$ . Since  $G_\tau$  and  $G_{\tau'}$  only differ in two edges, from  $\mathcal{A}$  being  $(\epsilon, \delta)$ -differentially private for any  $j$  we have  $p_{\tau'}^{(j)} \leq e^{2\epsilon} \cdot p_\tau^{(j)} + \delta$ . So for any  $i, j$  we have

$$\sum_{\tau \in S_i} p_\tau^{(j)} \leq \sum_{\tau \in \bar{S}_i} (e^{2\epsilon} p_\tau^{(j)} + \delta) \quad (4)$$

From [Eq. \(3\)](#) we have

$$\begin{aligned} 2^n \cdot 0.05(n+2) &> \sum_{\tau \in \{0,1\}^n} \sum_{i: \tau_i=1} (1 - p_\tau^{(i)}) \\ &= \sum_{i=1}^n \sum_{\tau \in S_i} (1 - p_\tau^{(i)}) \\ &\geq \sum_{i=1}^n \sum_{\tau \in \bar{S}_i} (1 - [e^{2\epsilon} p_\tau^{(i)} + \delta]) \\ &= n2^{n-1}(1 - \delta) - e^{2\epsilon} \sum_{i=1}^n \sum_{\tau \in \bar{S}_i} p_\tau^{(i)} \end{aligned}$$

Where the last inequality comes from [Eq. \(4\)](#). Using [Eq. \(3\)](#) again, we have that  $\sum_{i=1}^n \sum_{\tau \in \bar{S}_i} p_\tau^{(i)} < 2^n \cdot 0.05(n+2)$ , so we have that  $2^n \cdot 0.05(n+2) > n2^{n-1}(1 - \delta) - e^{2\epsilon}(2^n \cdot 0.05(n+2))$ . Dividing by  $2^n$  we have

$$0.05(n+2)(1 + e^{2\epsilon}) > n(1 - \delta)/2.$$

Now since  $\epsilon \leq 1$ ,  $\delta \leq 0.1$ , and  $e^2 < 7.4$  we get that

$$0.05 \cdot 8.4(n+2) > 0.45n$$

Hence we have  $n < 28$  which is a contradiction to  $n > 30$ .  $\square$

## C Omitted Proofs

### C.1 Proof of [Claim 1](#)

By definition, we have

$$\frac{f_{\text{Lap}}(t + \tau)}{f_{\text{Lap}}(t)} = \frac{\frac{\epsilon}{2} \exp(-\epsilon|t + \tau|)}{\frac{\epsilon}{2} \exp(-\epsilon|t|)} = \exp(-\epsilon|t + \tau| + \epsilon|t|) \leq \exp(\tau\epsilon). \quad (5)$$

Also by definition, it holds  $F_{\text{Lap}}(t + \tau) = \int_{-\infty}^{t+\tau} f_{\text{Lap}}(x) dx$ . Using [Eq. \(5\)](#) we derive

$$F_{\text{Lap}}(t + \tau) \leq \exp(\tau\epsilon) \int_{-\infty}^{t+\tau} f_{\text{Lap}}(x - \tau) dx = \exp(\tau\epsilon) \int_{-\infty}^t f_{\text{Lap}}(x) dx = \exp(\tau\epsilon) F_{\text{Lap}}(t).$$

504 **C.2 Proof of [Lemma 3.1](#)**

505 To prove the lower-bound, we observe that if  $x < \alpha$  and  $y < \beta$ , then  $x < \alpha + \tau$  and  $y < \beta + \tau$  as  
 506 well. Hence, it trivially holds  $P(\alpha + \tau, \beta + \tau, \gamma) \geq P(\alpha, \beta, \gamma)$  and hence

$$\frac{P(\alpha + \tau, \beta + \tau, \gamma)}{P(\alpha, \beta, \gamma)} \geq 1.$$

507 We now analyze the upper-bound. For the sake of brevity, in the rest of this proof, we use  $F$  to denote  
 508  $F_{\text{Lap}}$  and  $f$  to denote  $f_{\text{Lap}}$ . We consider three cases depending on parameters  $\alpha, \beta, \gamma$ .

509 **Case  $\gamma \geq \alpha + \beta + 2\tau$ .** In this case we have  $\Pr[x + y < \gamma | x < \alpha, y < \beta] = 1 =$   
 510  $\Pr[x + y < \gamma | x < \alpha + \tau, y < \beta + \tau]$ . So we have that

$$\begin{aligned} P(\alpha, \beta, \gamma) &= \Pr[x + y < \gamma | x < \alpha, y < \beta] \cdot \Pr[x < \alpha, y < \beta] \\ &= \Pr[x < \alpha, y < \beta] \\ &= F(\alpha)F(\beta) \end{aligned}$$

511 Similarly,  $P(\alpha + \tau, \beta + \tau, \gamma) = F(\alpha + \tau)F(\beta + \tau)$ . Now using [Claim 1](#), we obtain that  
 512  $\frac{P(\alpha + \tau, \beta + \tau, \gamma)}{P(\alpha, \beta, \gamma)} \leq e^{2\tau\epsilon}$ .

513 **Case  $\gamma < \alpha + \beta$ .** We write  $P(\alpha, \beta, \gamma)$  as follows.

$$\begin{aligned} P(\alpha, \beta, \gamma) &= \int_{-\infty}^{\beta} \int_{-\infty}^{\min(\alpha, \gamma - y)} f_x(x|y) dx f_y(y) dy \\ &= \int_{-\infty}^{\beta} F(\min(\alpha, \gamma - y)) f(y) dy \\ &= F(\alpha) \int_{-\infty}^{\gamma - \alpha} f(y) dy + \int_{\gamma - \alpha}^{\beta} F(\gamma - y) f(y) dy \\ &= F(\alpha)F(\gamma - \alpha) + \int_{\gamma - \alpha}^{\beta} F(\gamma - y) f(y) dy \end{aligned} \tag{6}$$

514 Similar to [Eq. \(6\)](#) we have

$$P(\alpha + \tau, \beta + \tau, \gamma) = F(\alpha + \tau)F(\gamma - \alpha - \tau) + \int_{\gamma - \alpha - \tau}^{\beta + \tau} F(\gamma - y) f(y) dy \tag{7}$$

515 Now we rewrite [Eq. \(6\)](#) as follows to obtain a lower bound on  $P(\alpha, \beta, \gamma)$ .

$$\begin{aligned} P(\alpha, \beta, \gamma) &= F(\alpha)F(\gamma - \alpha - 2\tau) + \int_{\gamma - \alpha - 2\tau}^{\gamma - \alpha} F(\alpha) f(y) dy + \int_{\gamma - \alpha}^{\beta} F(\gamma - y) f(y) dy \\ &\geq F(\alpha)F(\gamma - \alpha - 2\tau) + e^{-2\tau\epsilon} \int_{\gamma - \alpha - 2\tau}^{\beta} F(\gamma - y) f(y) dy \end{aligned} \tag{8}$$

516 In obtaining the inequality, we used the fact that if  $y \in [\gamma - \alpha - 2\tau, \gamma - \alpha]$  then  $0 \leq (\gamma - y) - \alpha \leq 2\tau$   
 517 and so by [Claim 1](#) we have  $F(\alpha) \geq e^{-2\tau\epsilon} F(\gamma - y)$ .

518 Now we compare the two terms of [Eq. \(8\)](#) with [Eq. \(7\)](#). By [Claim 1](#) we have that  $F(\alpha)F(\gamma - \alpha - 2\tau) \geq$   
 519  $e^{-2\tau\epsilon} F(\alpha + \tau)F(\gamma - \alpha - \tau)$  and  $\int_{\gamma - \alpha - 2\tau}^{\beta} F(\gamma - y) f(y) dy \geq e^{-\tau\epsilon} \int_{\gamma - \alpha - \tau}^{\beta + \tau} F(\gamma - y) f(y) dy$ . So  
 520 we have  $P(\alpha, \beta, \gamma) \geq e^{-3\tau\epsilon} P(\alpha + \tau, \beta + \tau, \gamma)$ .

521 **Case**  $\alpha + \beta \leq \gamma < \alpha + \beta + 2\tau$ . Then

$$\begin{aligned} P(\alpha, \beta, \gamma) &= \int_{-\infty}^{\beta} \int_{-\infty}^{\min(\alpha, \gamma-y)} f_x(x|y) dx f_y(y) dy \\ &= \int_{-\infty}^{\beta} F(\min(\alpha, \gamma-y)) f(y) dy \\ &= F(\alpha) F(\beta) \end{aligned} \tag{9}$$

$$\geq e^{-2\tau\epsilon} F(\alpha + \tau) F(\beta + \tau) \tag{10}$$

$$\begin{aligned} &= e^{-2\tau\epsilon} (F(\alpha + \tau) F(\beta - \tau) + F(\alpha + \tau) (F(\beta + \tau) - F(\beta - \tau))) \\ &\geq e^{-4\tau\epsilon} (F(\alpha + \tau) F(\beta + \tau) + F(\alpha + \tau) (F(\beta + \tau) - F(\beta - \tau))). \end{aligned} \tag{11}$$

522 Note that Eq. (9) is obtained since for any  $y \leq \beta$  we have  $\alpha \leq \gamma - y$ . Eq. (10) and Eq. (11) are both  
523 obtained using Claim 1. One can easily verify that Eq. (7) for  $P(\alpha + 1, \beta + 1, \gamma)$  holds in this case  
524 as well. Using the fact that  $\gamma - \alpha - \tau \leq \beta + \gamma$  and  $F$  being a non-decreasing function, we further  
525 lower-bound Eq. (7) as

$$\begin{aligned} P(\alpha + \tau, \beta + \tau, \gamma) &\leq F(\alpha + \tau) F(\beta + \tau) + \int_{\gamma - \alpha - \tau}^{\beta + \tau} F(\gamma - y) f(y) dy \\ &\leq F(\alpha + \tau) F(\beta + \tau) + F(\alpha + \tau) \int_{\gamma - \alpha - \tau}^{\beta + \tau} f(y) dy \\ &= F(\alpha + \tau) F(\beta + \tau) + F(\alpha + \tau) (F(\beta + \tau) - F(\gamma - \alpha - \tau)) \\ &\leq F(\alpha + \tau) F(\beta + \tau) + F(\alpha + \tau) (F(\beta + \tau) - F(\beta - \tau)). \end{aligned} \tag{12}$$

526 Eqs. (11) and (12) conclude the analysis of this case as well.

### 527 C.3 Proof of Theorem 4.1

528 We use induction on  $k$  to prove the theorem. Suppose that Algorithm 2 outputs  $C_{ALG}$ . We show  
529 that the  $C_{ALG}$  is a multiway  $k$ -cut and that the value of  $C_{ALG}$  is at most  $w(E(\bar{V})) + \sum_{i=1}^k \delta(V_i) +$   
530  $2 \log(k)e(n)$ . We will first perform the analysis of approximation assuming that  $\mathcal{A}$  provides the  
531 stated approximation deterministically, and at the end of this proof, we will take into account that the  
532 approximation guarantee holds with probability  $1 - \alpha$ .

533 **Base case:**  $k = 1$ . If  $k = 1$ , then  $C_{ALG} = \emptyset$ , and so it is a multiway 1-cut and  $w(C_{ALG}) = 0 \leq$   
534  $\delta(V_1) + w(E(\bar{V}))$ .

535 **Inductive step:**  $k \geq 2$ . So suppose that  $k \geq 2$ . Hence,  $k' \geq 1$  and  $k - k' \geq 1$ , where  $k'$  is defined on  
536 Line 4. Let  $(A, B)$  be the  $s$ - $t$  cut obtained in Line 6, where  $\tilde{G}_1$  is the graph induced on  $A$  and  $\tilde{G}_2$  is the  
537 graph induced on  $B$ . Since the only terminals in  $\tilde{G}_1$  are  $s_1, \dots, s_{k'}$ , we have that  $V_1 \cap A, \dots, V_{k'} \cap A$   
538 is a partial multiway  $k'$ -cut on  $\tilde{G}_1$ . By the induction hypothesis, the cost of the multiway cut that  
539 Algorithm 2 finds on  $\tilde{G}_1$  is at most  $w(E(\bar{V} \cap A)) + \sum_{i=1}^{k'} \delta_{\tilde{G}_1}(V_i \cap A) + 2 \log(k')e(|A|)$ . Similarly, by  
540 considering the partial multiway  $(k - k')$  cut  $V_{k'+1} \cap B, \dots, V_k \cap B$  on  $\tilde{G}_2$ , the cost of the multiway cut  
541 that Algorithm 2 finds on  $\tilde{G}_2$  is at most  $w(E(\bar{V} \cap B)) + \sum_{i=k'+1}^k \delta_{\tilde{G}_2}(V_i \cap B) + 2 \log(k - k')e(|B|)$ .  
542 So the total cost  $w(C_{ALG})$  of the multiway cut that Algorithm 2 outputs is at most

$$\begin{aligned} w(C_{ALG}) &\leq w(E(\bar{V} \cap A)) + w(E(\bar{V} \cap B)) \\ &\quad + \sum_{i=1}^{k'} \delta_{\tilde{G}_1}(V_i \cap A) + \sum_{i=k'+1}^k \delta_{\tilde{G}_2}(V_i \cap B) \\ &\quad + w(E(A, B)) \\ &\quad + 2 \log(k')e(|A|) + 2 \log(k - k')e(|B|) \end{aligned} \tag{13}$$

543 First note that  $C_{ALG}$  is a multiway  $k$ -cut: this is because by induction the output of the algorithm on  
544  $\tilde{G}_1$  is a multiway  $k'$ -cut and the output of the algorithm on  $\tilde{G}_2$  is a multiway  $(k - k')$ -cut. Moreover,

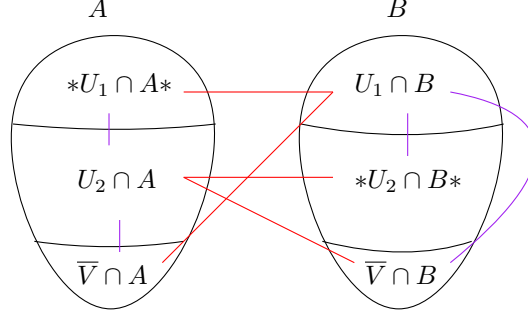

Figure 2: Node subsets of graph  $G$ . The subsets in asterisks have terminals in them. Red edges indicate the left-hand side edges in [Eq. \(14\)](#), and purple edges indicate the edges on the right-hand side in [Eq. \(14\)](#).

545  $E(A, B) \in C_{ALG}$ . So the union of these cuts and  $E(A, B)$  is a  $k$ -cut, and since each terminal is in  
 546 exactly one partition, it is a multiway  $k$ -cut.

547 Now we prove the value guarantees. Let  $U_1 = V_1 \cup \dots \cup V_{k'}$  and  $U_2 = V_{k'+1} \cup \dots \cup V_k$ . So  
 548  $U = U_1 \cup U_2 = V_1 \cup \dots \cup V_k$  is the set of nodes that are in at least one partition. Recall that  
 549  $\bar{V} = V \setminus U$  is the set of nodes that are not in any partition.

550 Consider the following cut that separates  $\{s_1, \dots, s_{k'}\}$  from  $\{s_{k'+1}, \dots, s_k\}$ : Let  $A' = [U_1 \cap$   
 551  $A] \cup [U_1 \cap B] \cup [\bar{V} \cap A]$ . Let  $B' = [U_2 \cap B] \cup [U_2 \cap A] \cup [\bar{V} \cap B]$ . Since  $(A, B)$  is a *min* cut  
 552 that separates  $\{s_1, \dots, s_{k'}\}$  from  $\{s_{k'+1}, \dots, s_k\}$  with additive error  $e(n)$ , we have  $w(E(A, B)) \leq$   
 553  $w(E(A', B')) + e(n)$ . Note that  $A = [U_1 \cap A] \cup [U_2 \cap A] \cup [\bar{V} \cap A]$  and  $B = [U_1 \cap B] \cup [U_2 \cap B] \cup [\bar{V} \cap B]$ .  
 554 So turning  $(A, B)$  into  $(A', B')$  is equivalent to switching  $U_2 \cap A$  and  $U_1 \cap B$  between  $A$  and  $B$ . So  
 555 we have that

$$\begin{aligned} & w(E(U_2 \cap A, U_2 \cap B)) + w(E(U_2 \cap A, \bar{V} \cap B)) + w(E(U_1 \cap B, U_1 \cap A)) + w(E(U_1 \cap B, \bar{V} \cap A)) \\ & \leq \\ & w(E(U_2 \cap A, U_1 \cap A)) + w(E(U_2 \cap A, \bar{V} \cap A)) + w(E(U_1 \cap B, U_2 \cap B)) + w(E(U_1 \cap B, \bar{V} \cap B)) \\ & + e(n) \end{aligned} \quad (14)$$

556 [Eq. \(14\)](#) is illustrated in [Figure 2](#). Using [Eq. \(14\)](#) we obtain that

$$\begin{aligned} w(E(A, B)) &= w(E(U_2 \cap A, U_2 \cap B)) + w(E(U_2 \cap A, \bar{V} \cap B)) \\ &+ w(E(U_1 \cap B, U_1 \cap A)) + w(E(U_1 \cap B, \bar{V} \cap A)) \\ &+ w(E(U_2 \cap A, U_1 \cap B)) + w(E([U_1 \cap A] \cup [\bar{V} \cap A], [U_2 \cap B] \cup [\bar{V} \cap B])) \\ &\leq w(E(U_2 \cap A, U_1 \cap A)) + w(E(U_2 \cap A, \bar{V} \cap A)) \\ &+ w(E(U_1 \cap B, U_2 \cap B)) + w(E(U_1 \cap B, \bar{V} \cap B)) \\ &+ w(E(U_2 \cap A, U_1 \cap B)) + w(E([U_1 \cap A] \cup [\bar{V} \cap A], [U_2 \cap B] \cup [\bar{V} \cap B])) \\ &+ e(n) \end{aligned}$$

557 So we conclude that

$$\begin{aligned} w(E(A, B)) &\leq w(E(U_1 \cap B, [U_2 \cap B] \cup [\bar{V} \cap B] \cup [U_2 \cap A])) \\ &+ w(E(U_1 \cap A, [U_2 \cap B] \cup [\bar{V} \cap B])) \\ &+ w(E(U_2 \cap A, [U_1 \cap A] \cup [\bar{V} \cap A])) \\ &+ w(E(U_2 \cap B, \bar{V} \cap A)) \\ &+ w(E(\bar{V} \cap A, \bar{V} \cap B)) \\ &+ e(n) \end{aligned} \quad (15)$$

558 We substitute  $w(E(A, B))$  in [Eq. \(13\)](#) using [Eq. \(15\)](#). Recall that  $U_1 = \cup_{i=1}^{k'} V_i$ ,  $\delta_{\bar{G}_1}(V_i \cap A) =$   
 559  $w(E(V_i \cap A, A \setminus V_i))$  and  $\delta_G(V_i) = w(E(V_i, V \setminus V_i))$ . For any  $i \in \{1, \dots, k'\}$ , we have that

560  $E(V_i \cap B, [U_2 \cap B] \cup [\bar{V} \cap B] \cup [U_2 \cap A])$  and  $E(V_i \cap A, [U_2 \cap B] \cup [\bar{V} \cap B])$  are both disjoint  
 561 from  $E(V_i \cap A, A \setminus V_i)$ . Moreover all these three terms appear in  $E(V_i, V \setminus V_i)$ . So we have

$$\begin{aligned} & w(E(U_1 \cap B, [U_2 \cap B] \cup [\bar{V} \cap B] \cup [U_2 \cap A])) \\ & + w(E(U_1 \cap A, [U_2 \cap B] \cup [\bar{V} \cap B])) + \sum_{i=1}^{k'} \delta_{\tilde{G}_1}(V_i \cap A) \\ & \leq \sum_{i=1}^{k'} \delta_G(V_i) \end{aligned}$$

562 Note that the first two terms above are the first two terms in [Eq. \(15\)](#). Similarly, we have

$$w(E(U_2 \cap A, [U_1 \cap A] \cup [\bar{V} \cap A])) + w(E(U_2 \cap B, \bar{V} \cap A)) + \sum_{i=k'+1}^k \delta_{\tilde{G}_2}(V_i \cap B) \leq \sum_{i=k'+1}^k \delta_G(V_i) \quad (16)$$

563 Note that the first two terms above are the third and forth terms in [Eq. \(15\)](#). Finally  $w(E(\bar{V} \cap A)) +$   
 564  $w(E(\bar{V} \cap B)) + w(E(\bar{V} \cap A, \bar{V} \cap B)) \leq w(E(\bar{V}))$ . So, we upper-bound [Eq. \(13\)](#) as

$$\begin{aligned} w(C_{ALG}) & \leq \sum_{i=1}^k \delta_G(V_i) + w(E(\bar{V})) \\ & + e(n) + 2 \log(k')e(|A|) + 2 \log(k - k')e(|B|). \end{aligned}$$

565 Since  $k' = \lfloor k/2 \rfloor$  and  $k - k' = \lceil k/2 \rceil$ , we have that  $k' \leq \lfloor \frac{k+1}{2} \rfloor$  and  $k - k' \leq \lfloor \frac{k+1}{2} \rfloor$ . Moreover,  
 566 since  $e = cn/\epsilon$  for  $\epsilon > 0$  and  $c \geq 0$ , we have that  $e(|A|) + e(|B|) \leq e(|A| + |B|) = e(n)$ . Therefore,

$$\begin{aligned} & e(n) + 2 \log(k')e(|A|) + 2 \log(k - k')e(|B|) \\ & \leq e(n)(1 + 2 \log\left(\left\lfloor \frac{k+1}{2} \right\rfloor\right)) \leq 2 \log(k)e(n). \end{aligned}$$

567 The above inequality finishes the approximation proof.

568 **The success probability.** As proved by [Lemma 4.1](#) the min  $s$ - $t$  cut computations by [Algorithm 2](#)  
 569 can be seen as invocations of a min  $s$ - $t$  cut algorithm on  $O(\log k)$  many  $n$ -node graphs; in this claim,  
 570 we use  $\mathcal{A}$  to compute min  $s$ - $t$  cuts. By union bound, each of those  $O(\log k)$  invocations output the  
 571 desired additive error by probability at least  $1 - \alpha O(\log k)$ .
